# Supplementary material for: Large-scale ERT surveys for investigating shallow regolithproperties and architecture
Source: Copernicus journal article supplement (doi:10.5194/hess-2018-519), 2018-12-07
Supplement: Supplementary file 1 [file hess-2018-519-supplement.pdf]

## **Supplement of**

# **Large-scale ERT surveys for investigating shallow regolith properties and architecture**

Laurent Gourdol<sup>1</sup>, Rémi Clément<sup>2</sup>, Jérôme Juilleret<sup>1</sup>, Laurent Pfister<sup>1</sup>, Christophe Hissler<sup>1</sup>

<sup>1</sup> Catchment and Eco-hydrology Research Group (CAT), Luxembourg Institute of Science and Technology (LIST), Belvaux, L-4422, Luxembourg

<sup>2</sup> REVERSAAL Research Unit, National Research Institute of Science and Technology for Environment and Agriculture (IRSTEA), Villeurbanne, F-69626, France

*Correspondence to:* Laurent Gourdol (laurent.gourdol@list.lu)

### **Contents of this file**

Figures S1 to S12

### **Introduction**

The 300 resistivity models resulting from the inversion of the synthetic resistivity models are provided in Figures S1-S12. Depending on the models, the inversion process was terminated after 1 to 11 iterations. As indicated by the root mean square misfit error (average: 0.89%, range: 0.40-2.12%) and the  $\chi^2$  mathematical criteria (average: 0.81, range: 0.16-4.11), acceptable convergence between the calculated and simulated apparent resistivity data was achieved for all models. In 98% of all cases, the root mean square misfit error and the  $\chi^2$  were less than 1.5 and 2, respectively.

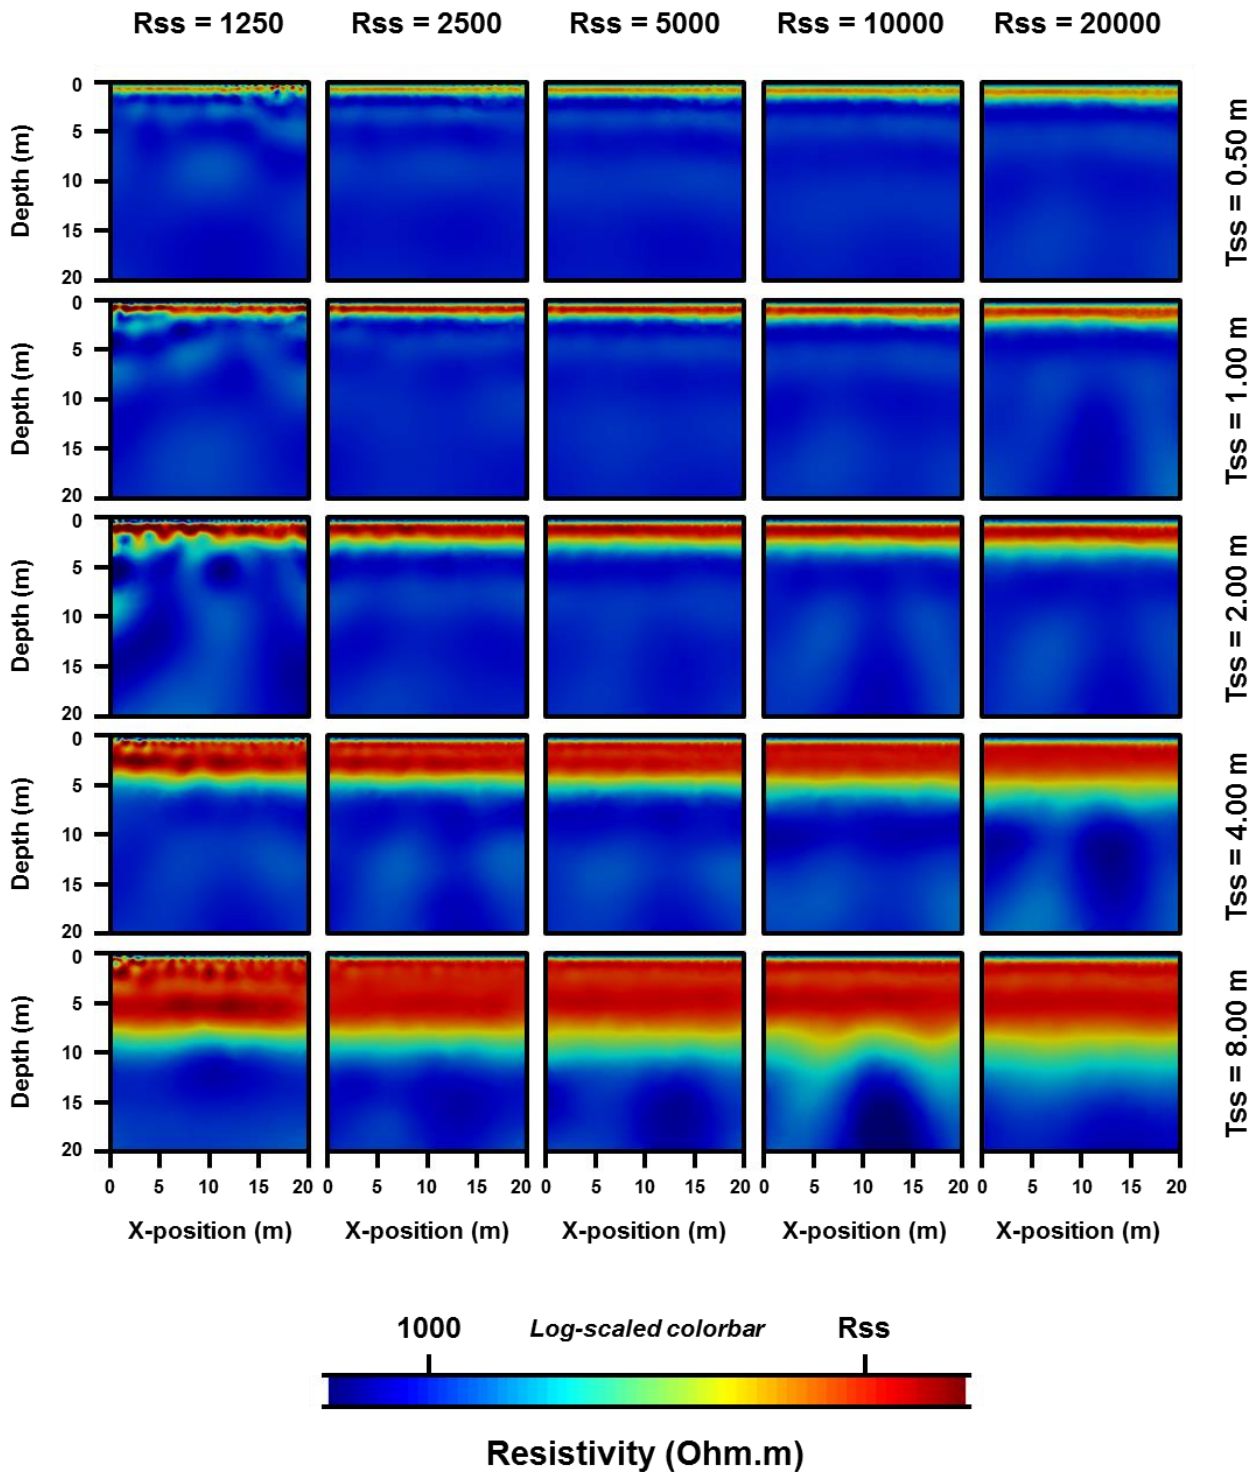

**Figure S1:** Results of inversion of the synthetic resistivity models (Rss and Tss values stand for the subsolum resistivity and thickness in the model, respectively) using the dipole-dipole array with an ESI of 0.25 m.

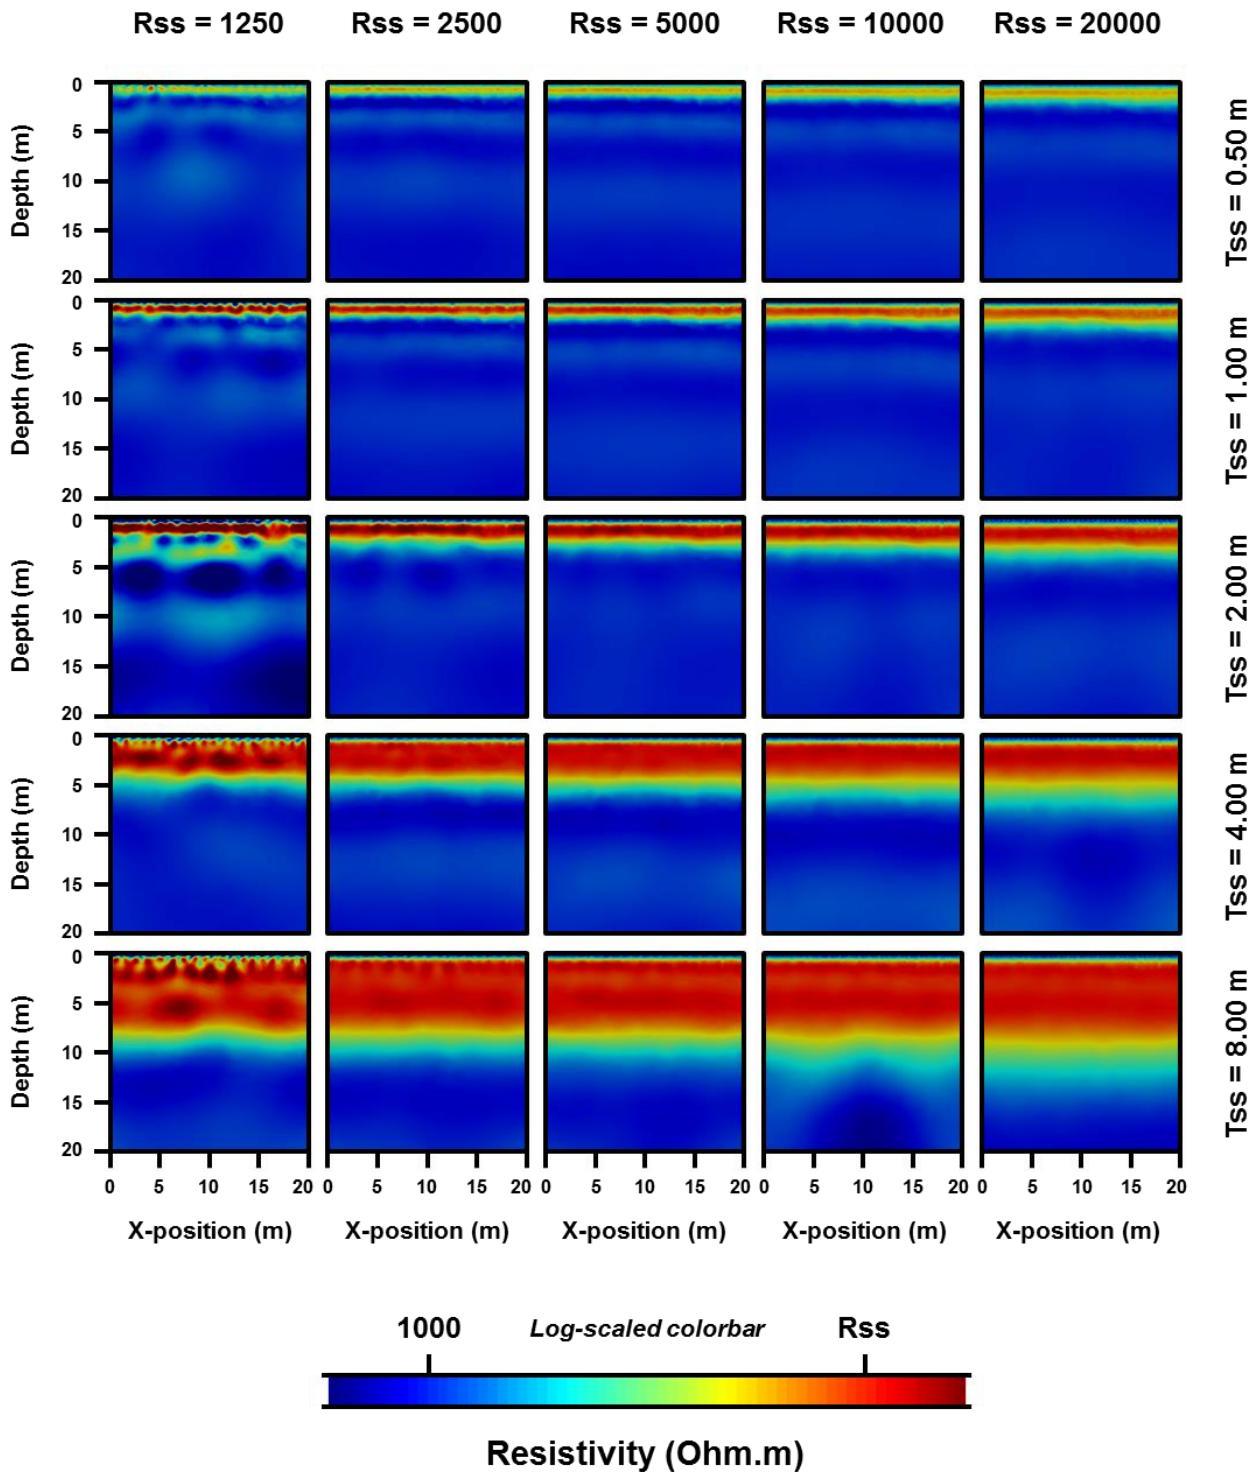

**Figure S2:** Results of inversion of the synthetic resistivity models ( $R_{ss}$  and  $T_{ss}$  values stand for the subsolum resistivity and thickness in the model, respectively) using the dipole-dipole array with an ESI of 0.5 m.

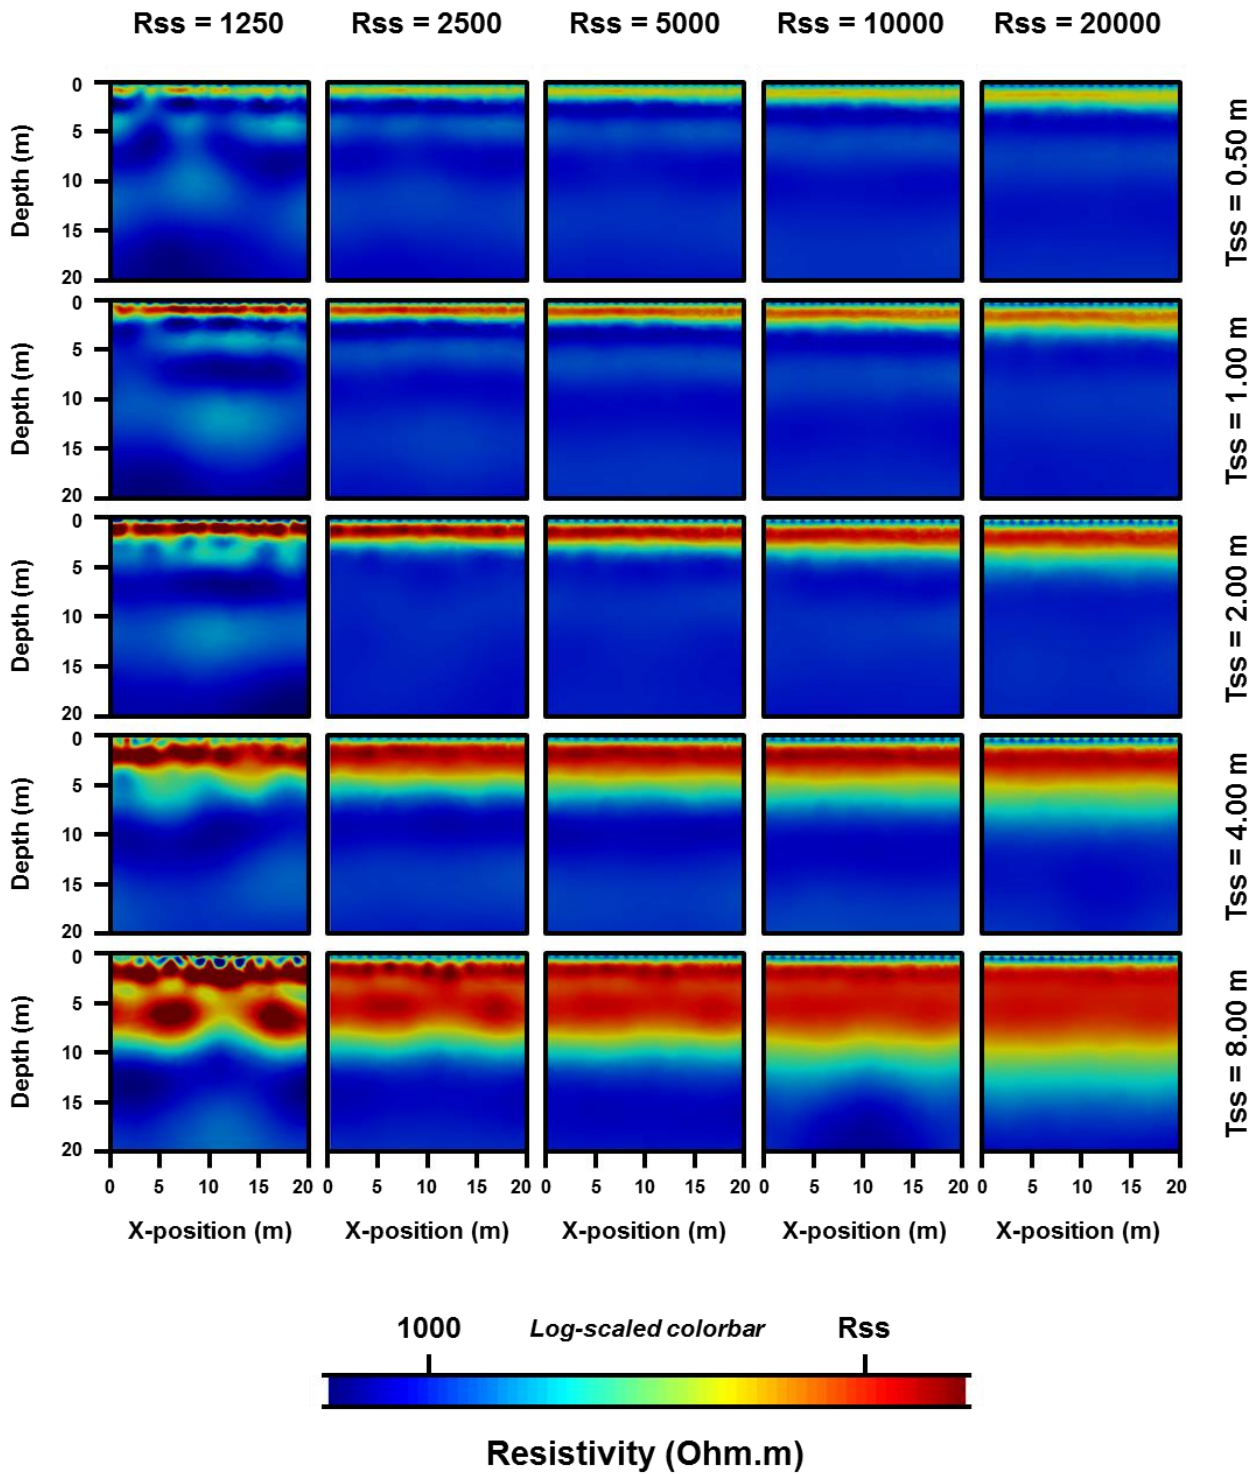

**Figure S3:** Results of inversion of the synthetic resistivity models (Rss and Tss values stand for the subsolum resistivity and thickness in the model, respectively) using the dipole-dipole array with an ESI of 1 m.

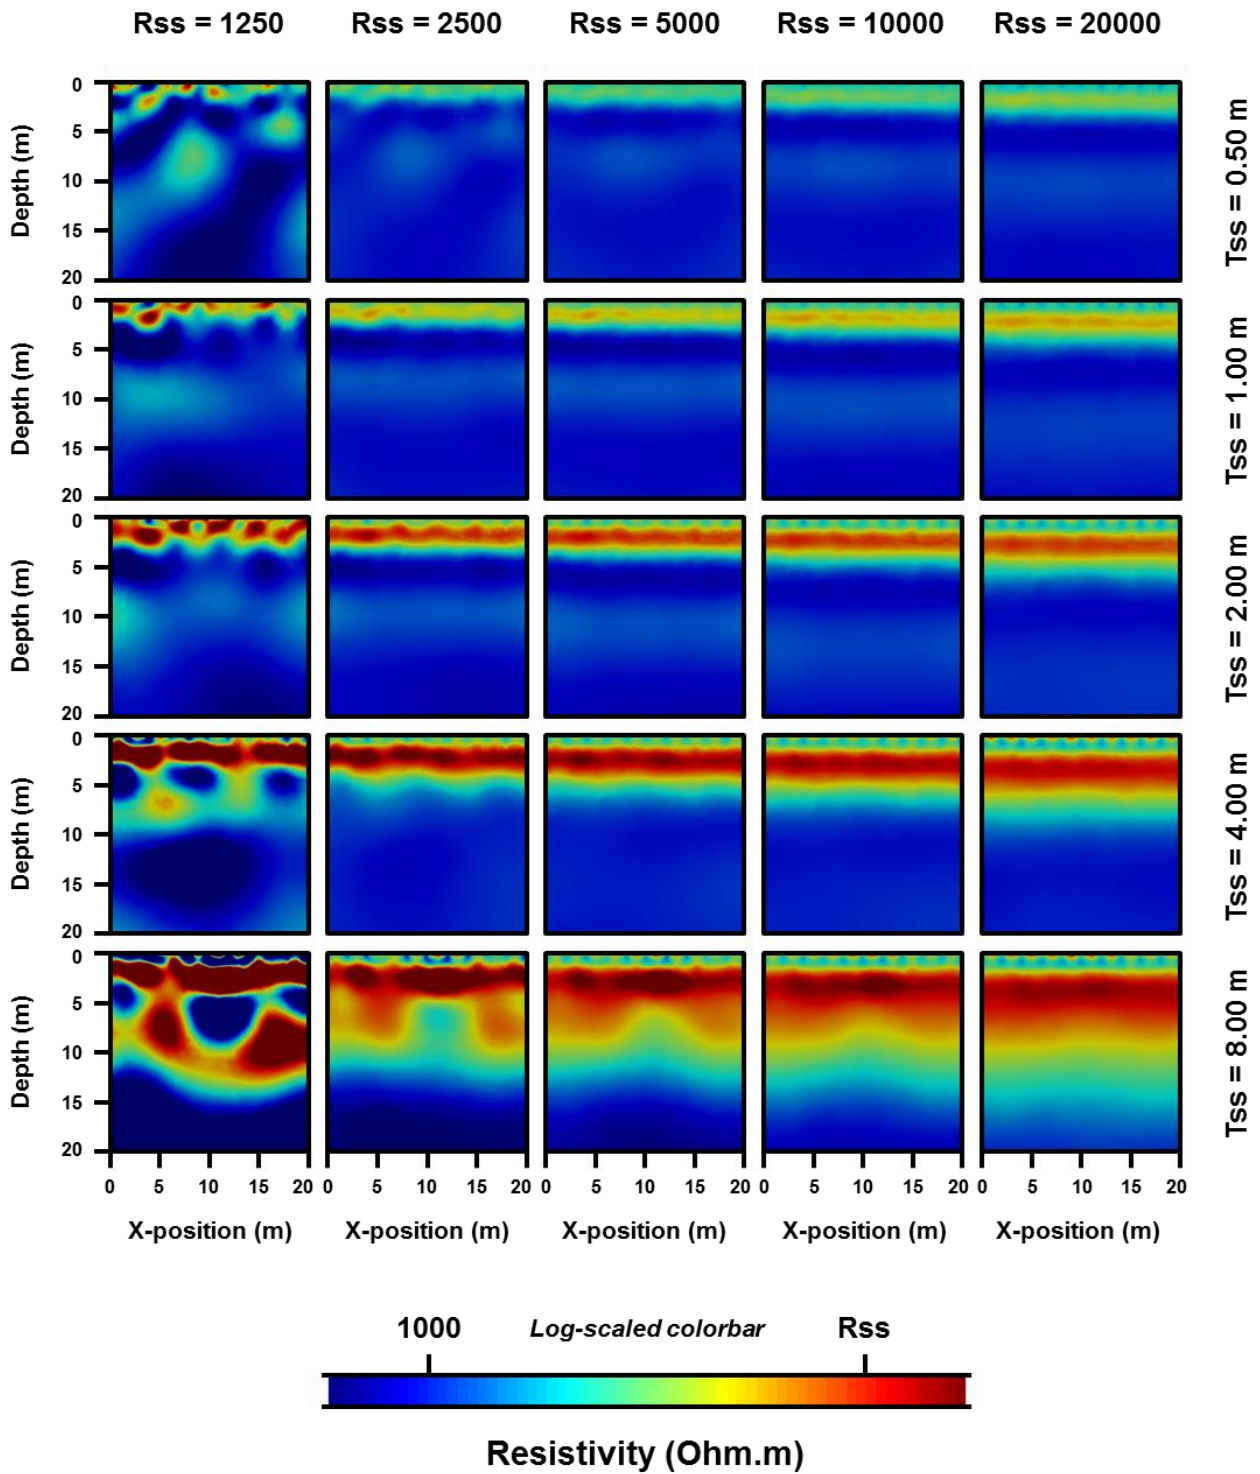

**Figure S4:** Results of inversion of the synthetic resistivity models (Rss and Tss values stand for the subsolum resistivity and thickness in the model, respectively) using the dipole-dipole array with an ESI of 2 m.



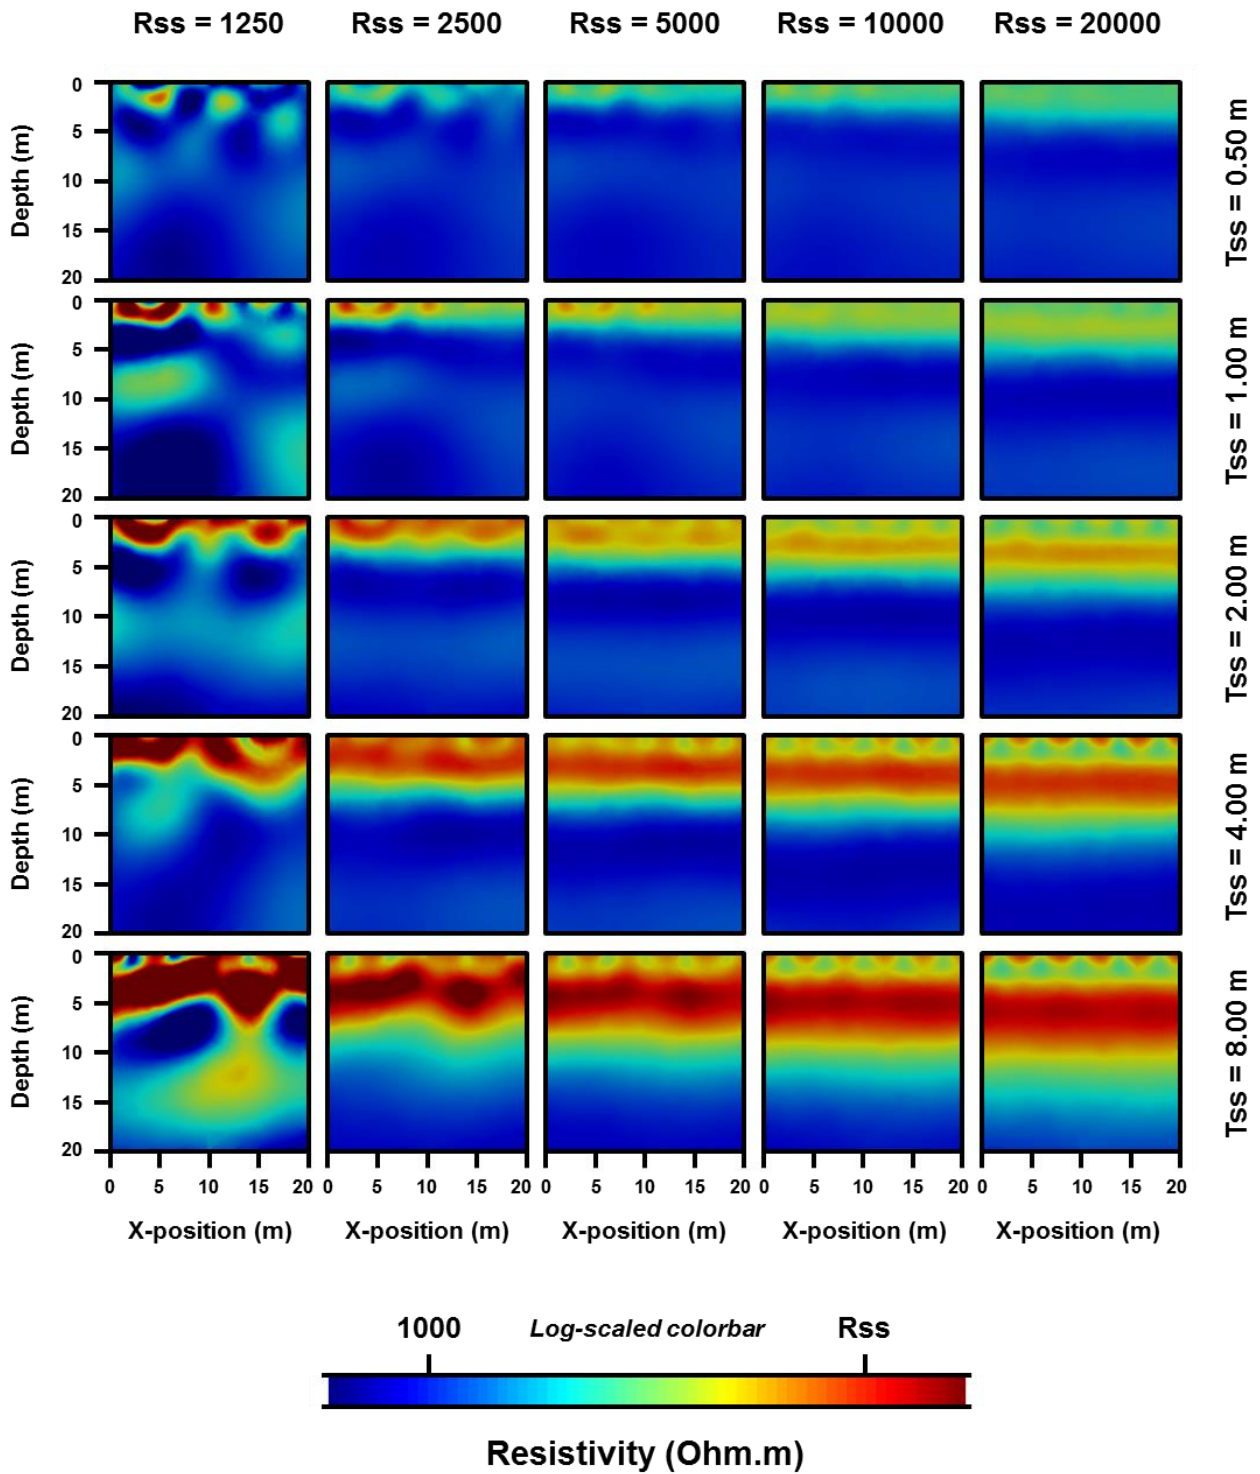

**Figure S5:** Results of inversion of the synthetic resistivity models (Rss and Tss values stand for the subsolum resistivity and thickness in the model, respectively) using the dipole-dipole array with an ESI of 4 m.

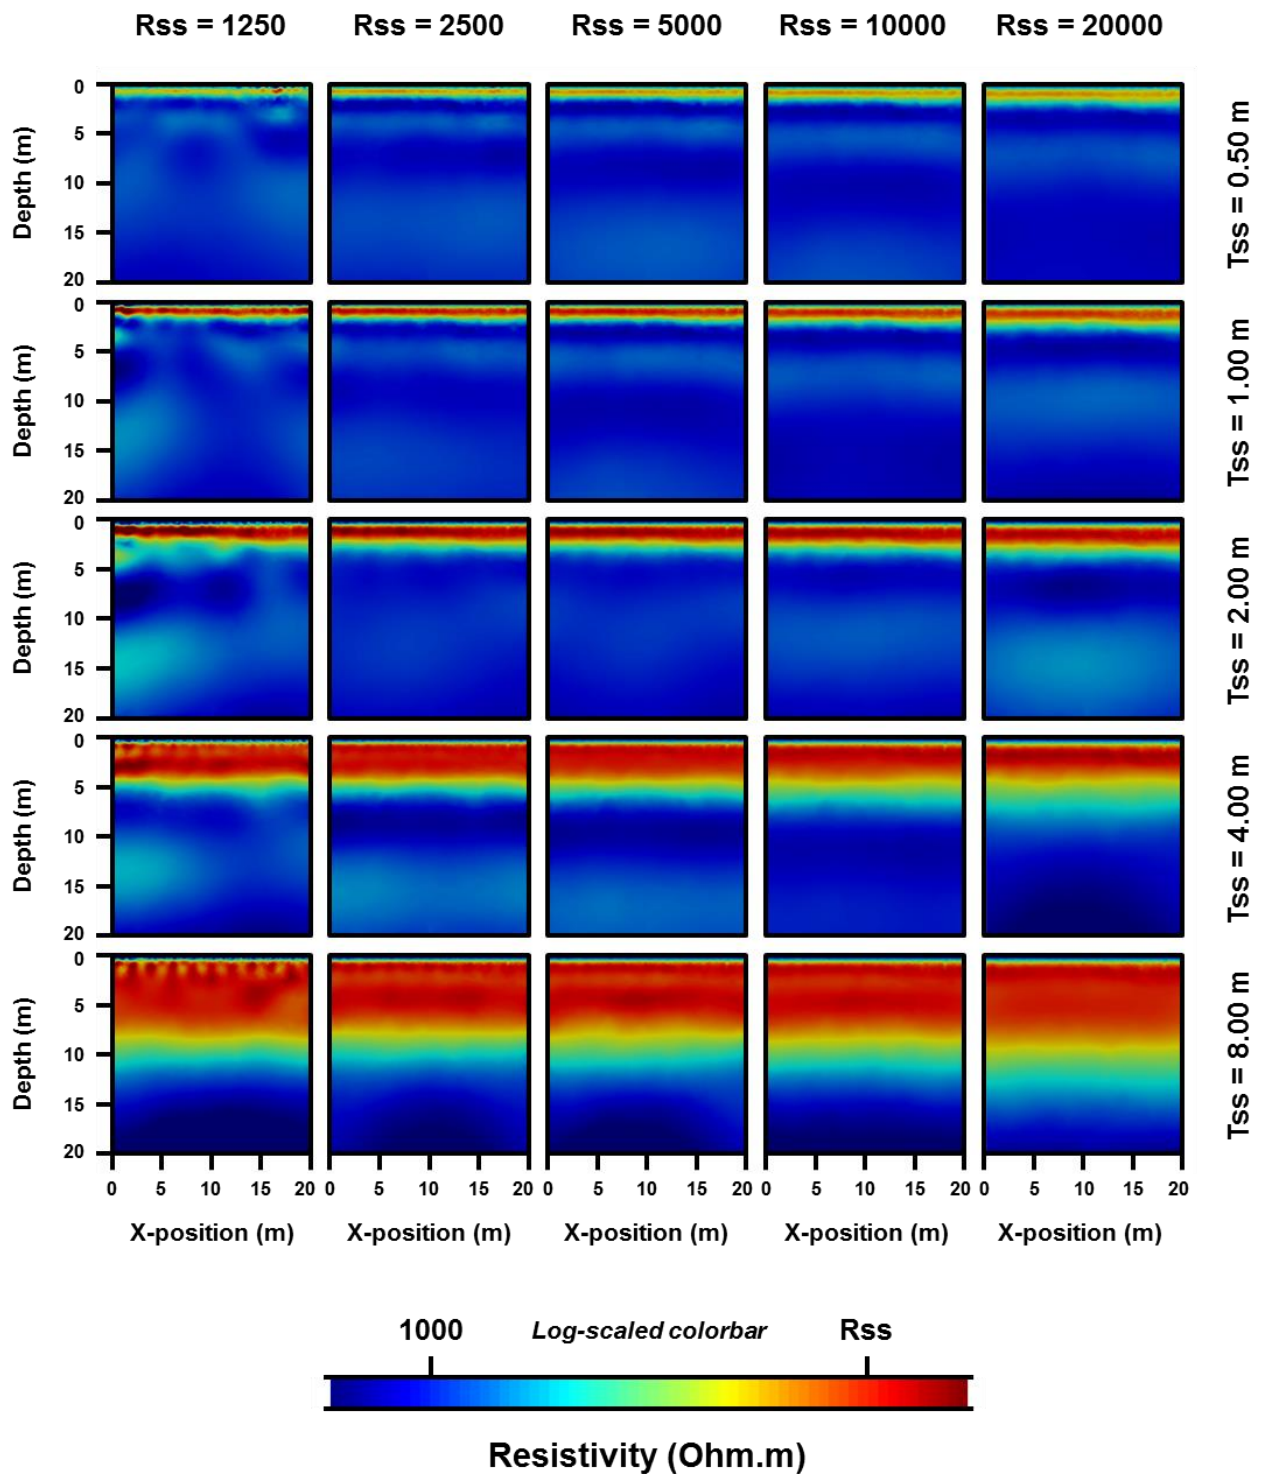

**Figure S6:** Results of inversion of the synthetic resistivity models ( $R_{ss}$  and  $T_{ss}$  values stand for the subsolum resistivity and thickness in the model, respectively) using the Wenner-Schlumberger array with an ESI of 0.25 m.

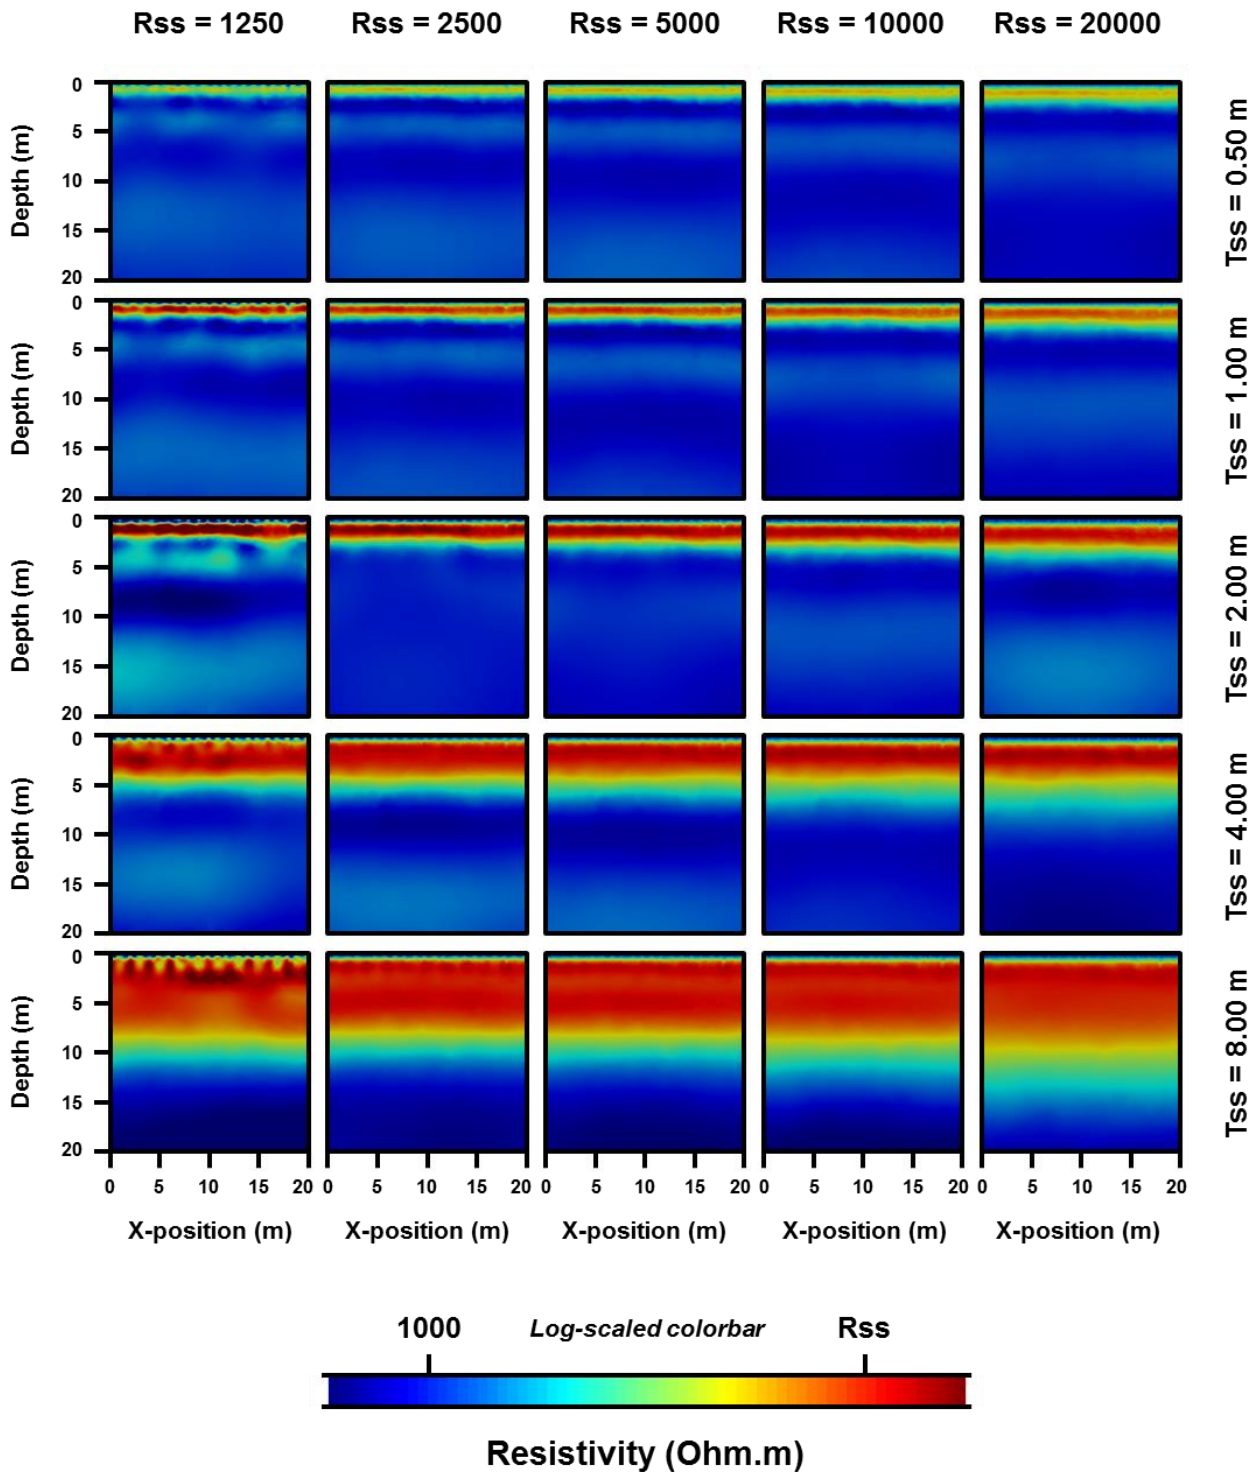

**Figure S7:** Results of inversion of the synthetic resistivity models (Rss and Tss values stand for the subsolum resistivity and thickness in the model, respectively) using the Wenner-Schlumberger array with an ESI of 0.5 m.



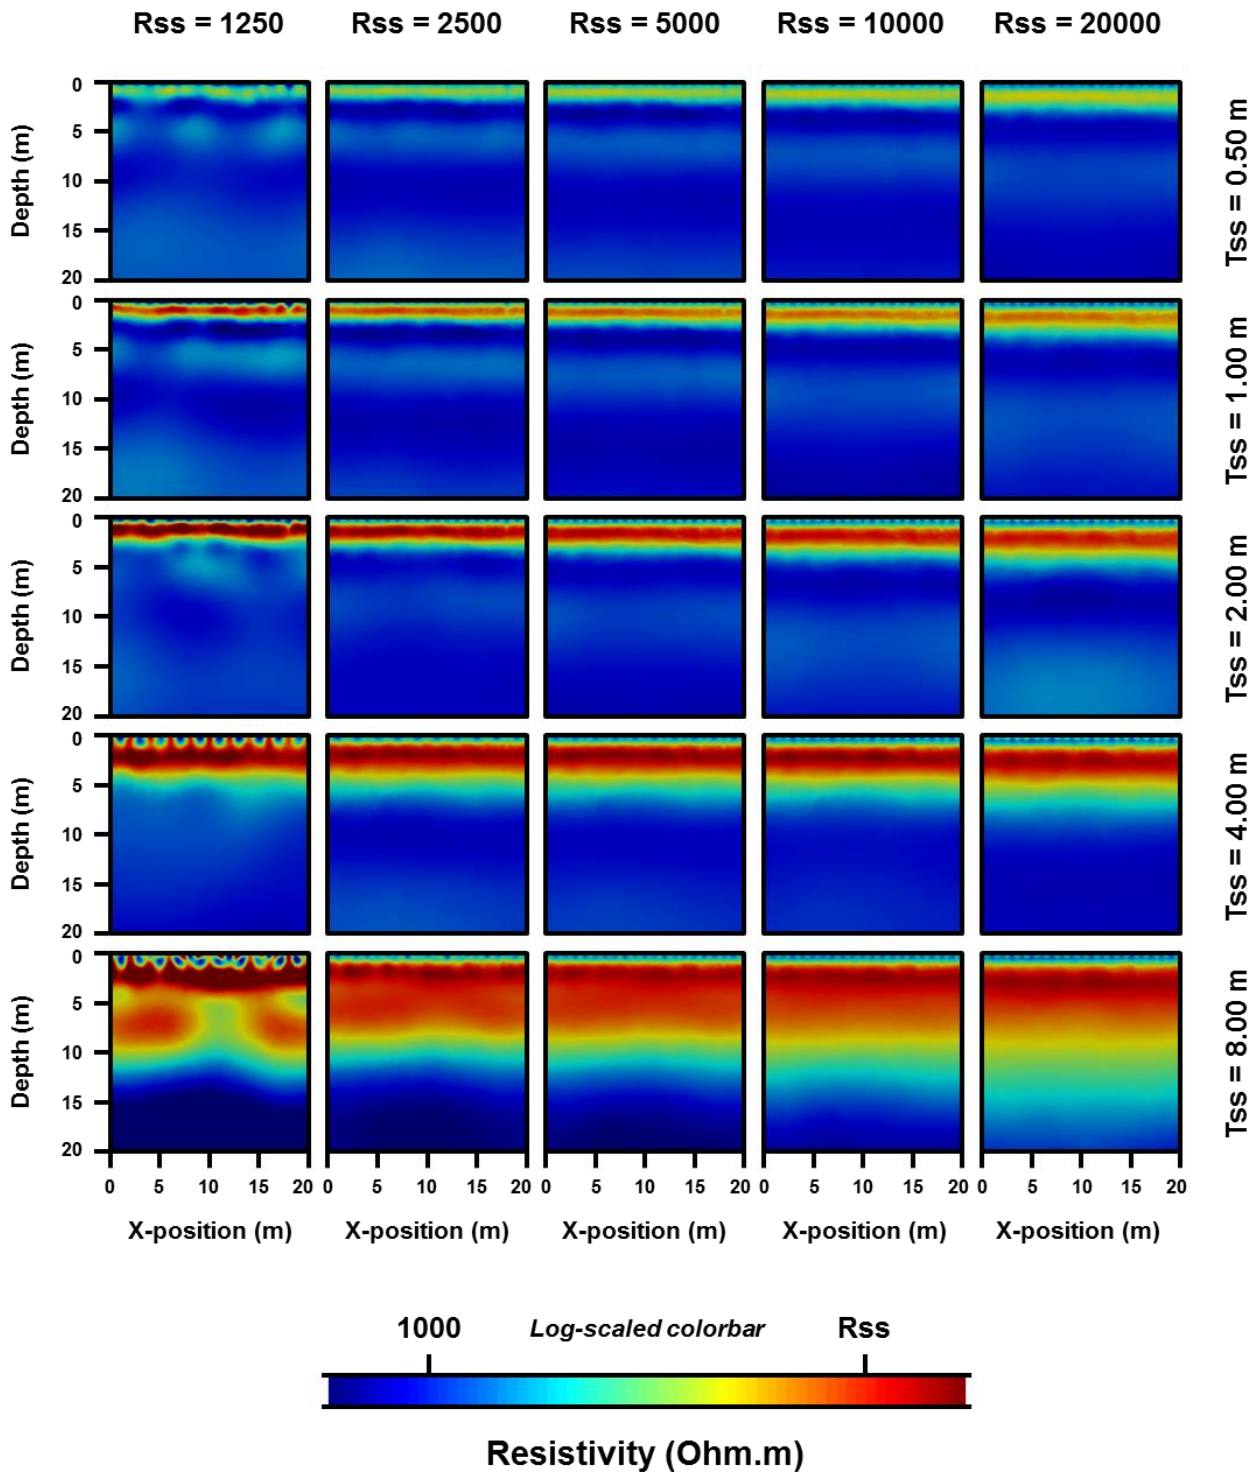

**Figure S8:** Results of inversion of the synthetic resistivity models (Rss and Tss values stand for the subsolum resistivity and thickness in the model, respectively) using the Wenner-Schlumberger array with an ESI of 1 m.

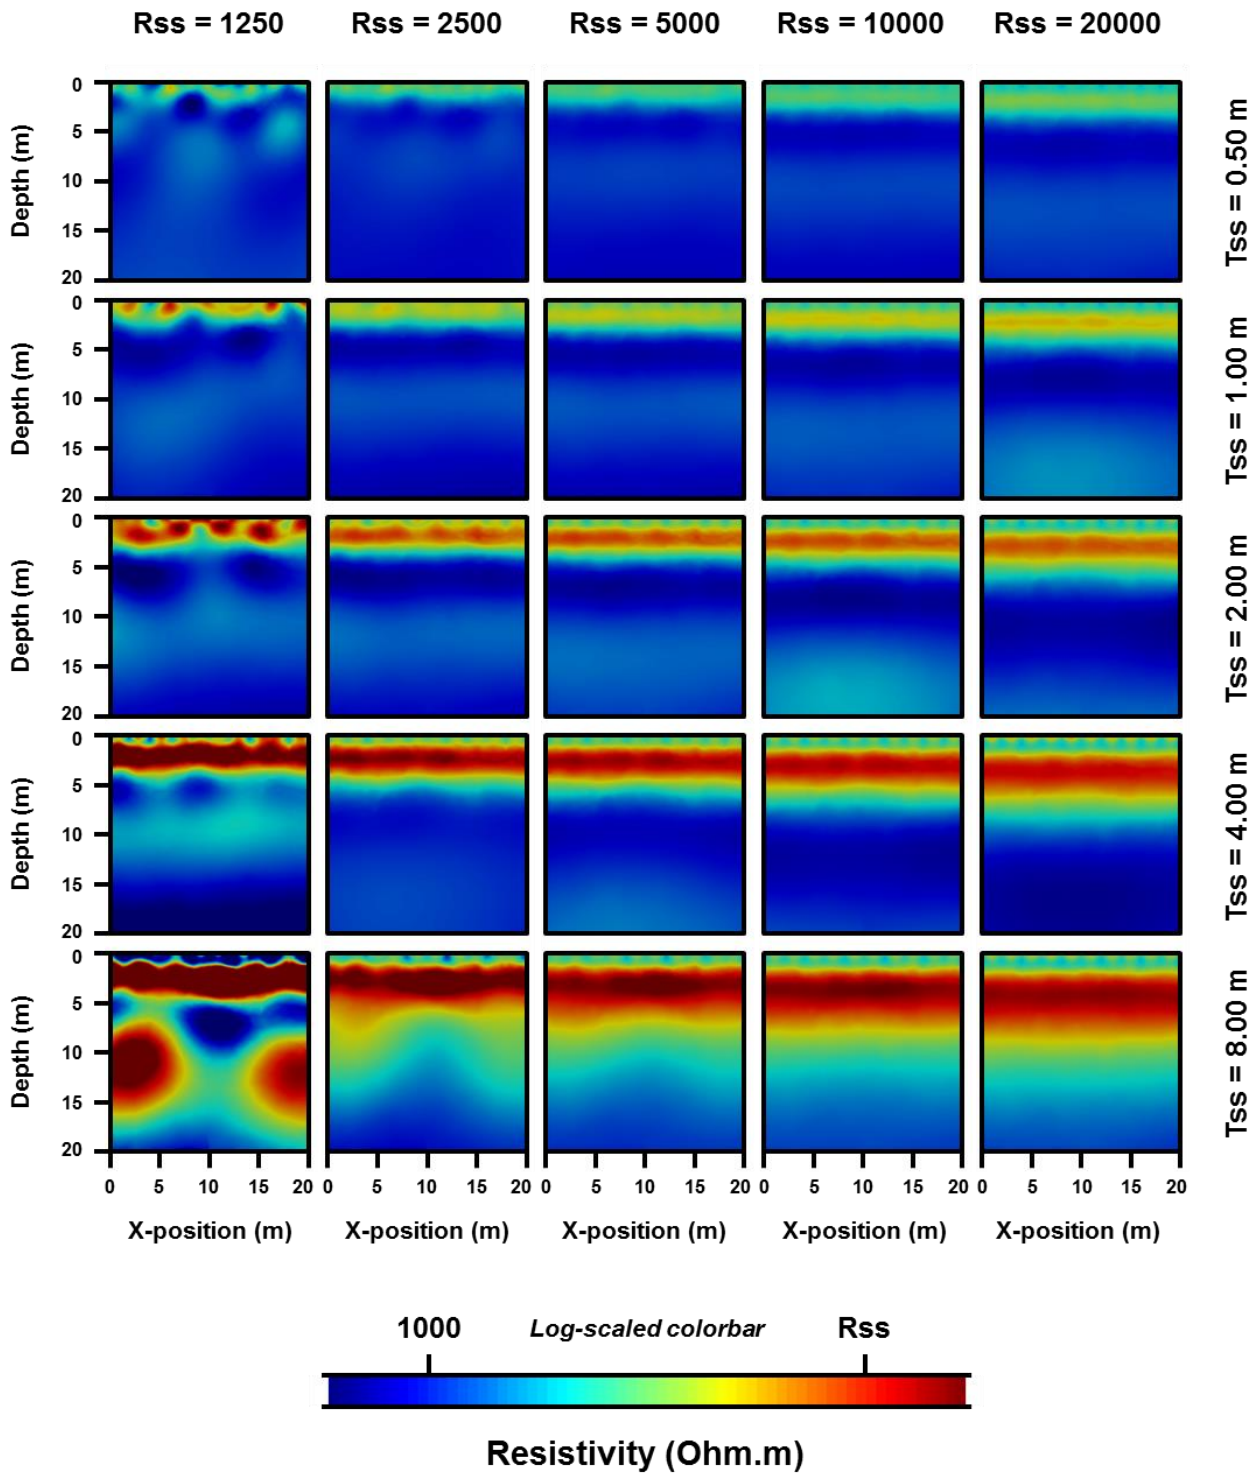

**Figure S9:** Results of inversion of the synthetic resistivity models (Rss and Tss values stand for the subsolum resistivity and thickness in the model, respectively) using the Wenner-Schlumberger array with an ESI of 2 m.

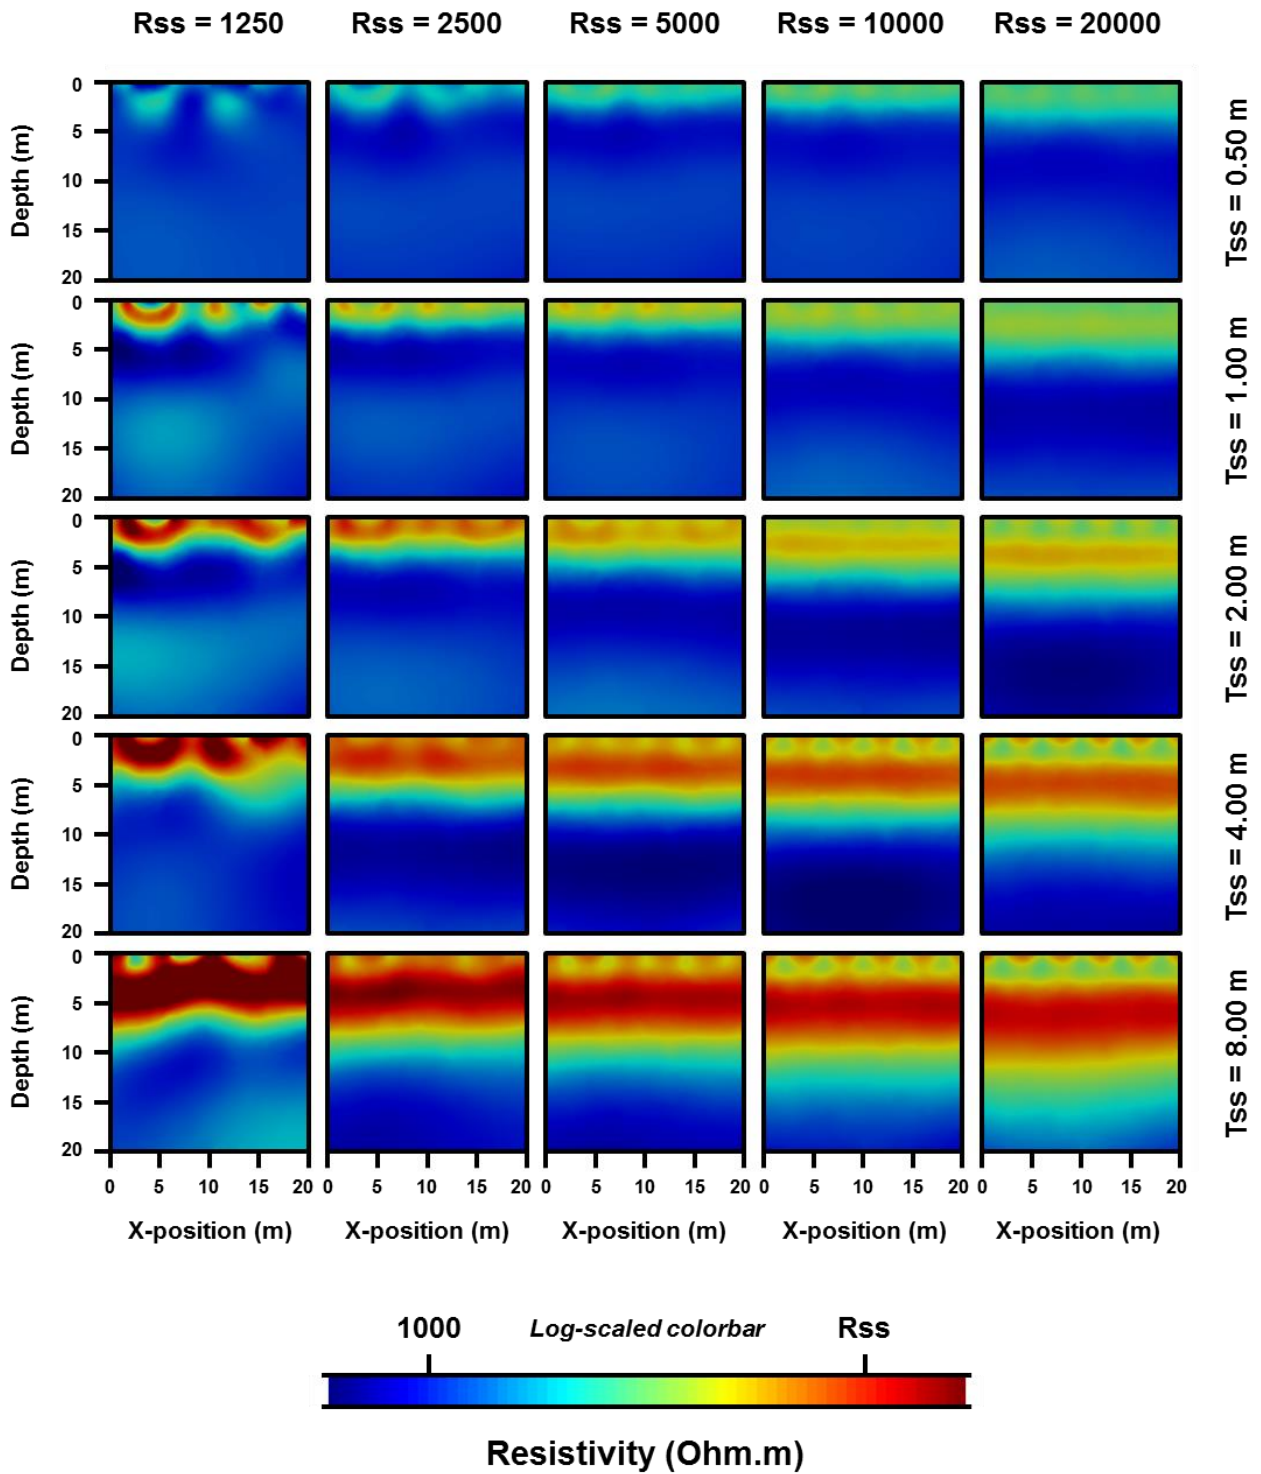

**Figure S10:** Results of inversion of the synthetic resistivity models (Rss and Tss values stand for the subsolum resistivity and thickness in the model, respectively) using the Wenner-Schlumberger array with an ESI of 4 m.

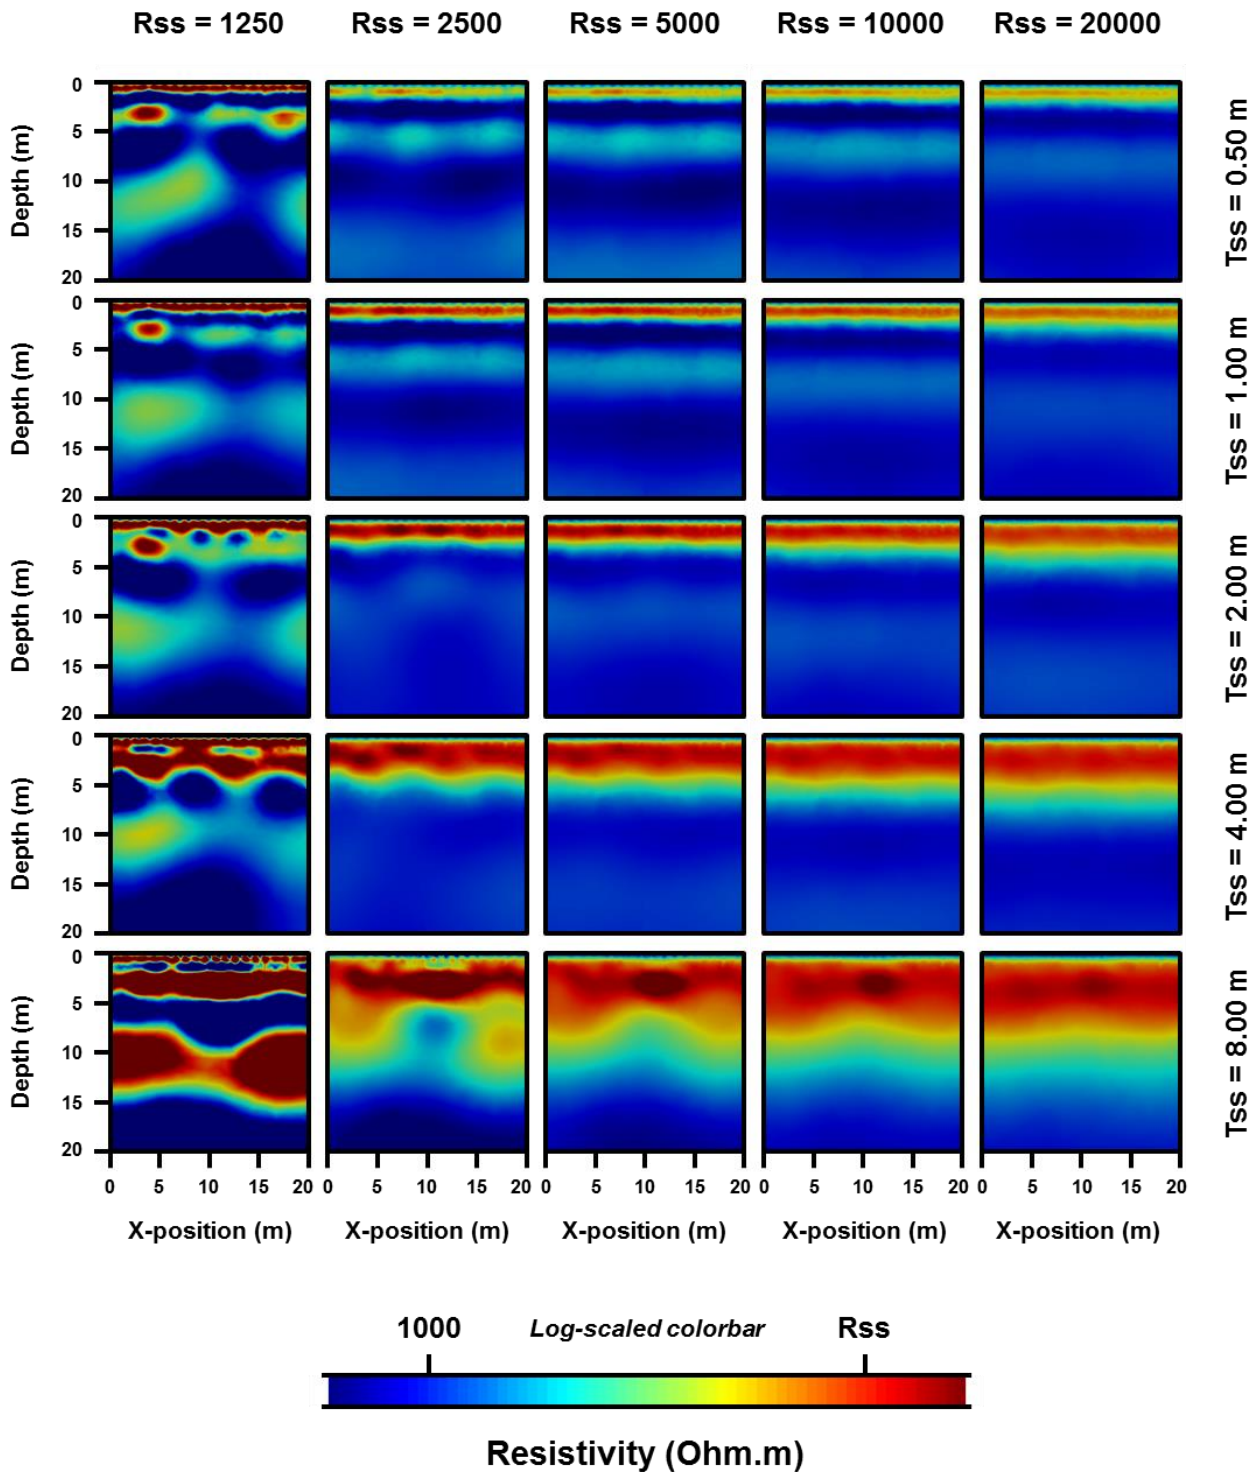

**Figure S11:** Results of inversion of the synthetic resistivity models (Rss and Tss values stand for the subsolum resistivity and thickness in the model, respectively) using the dipole-dipole array with an ESI of 2 m and upgraded with the four interpolated levels of surficial apparent resistivity.



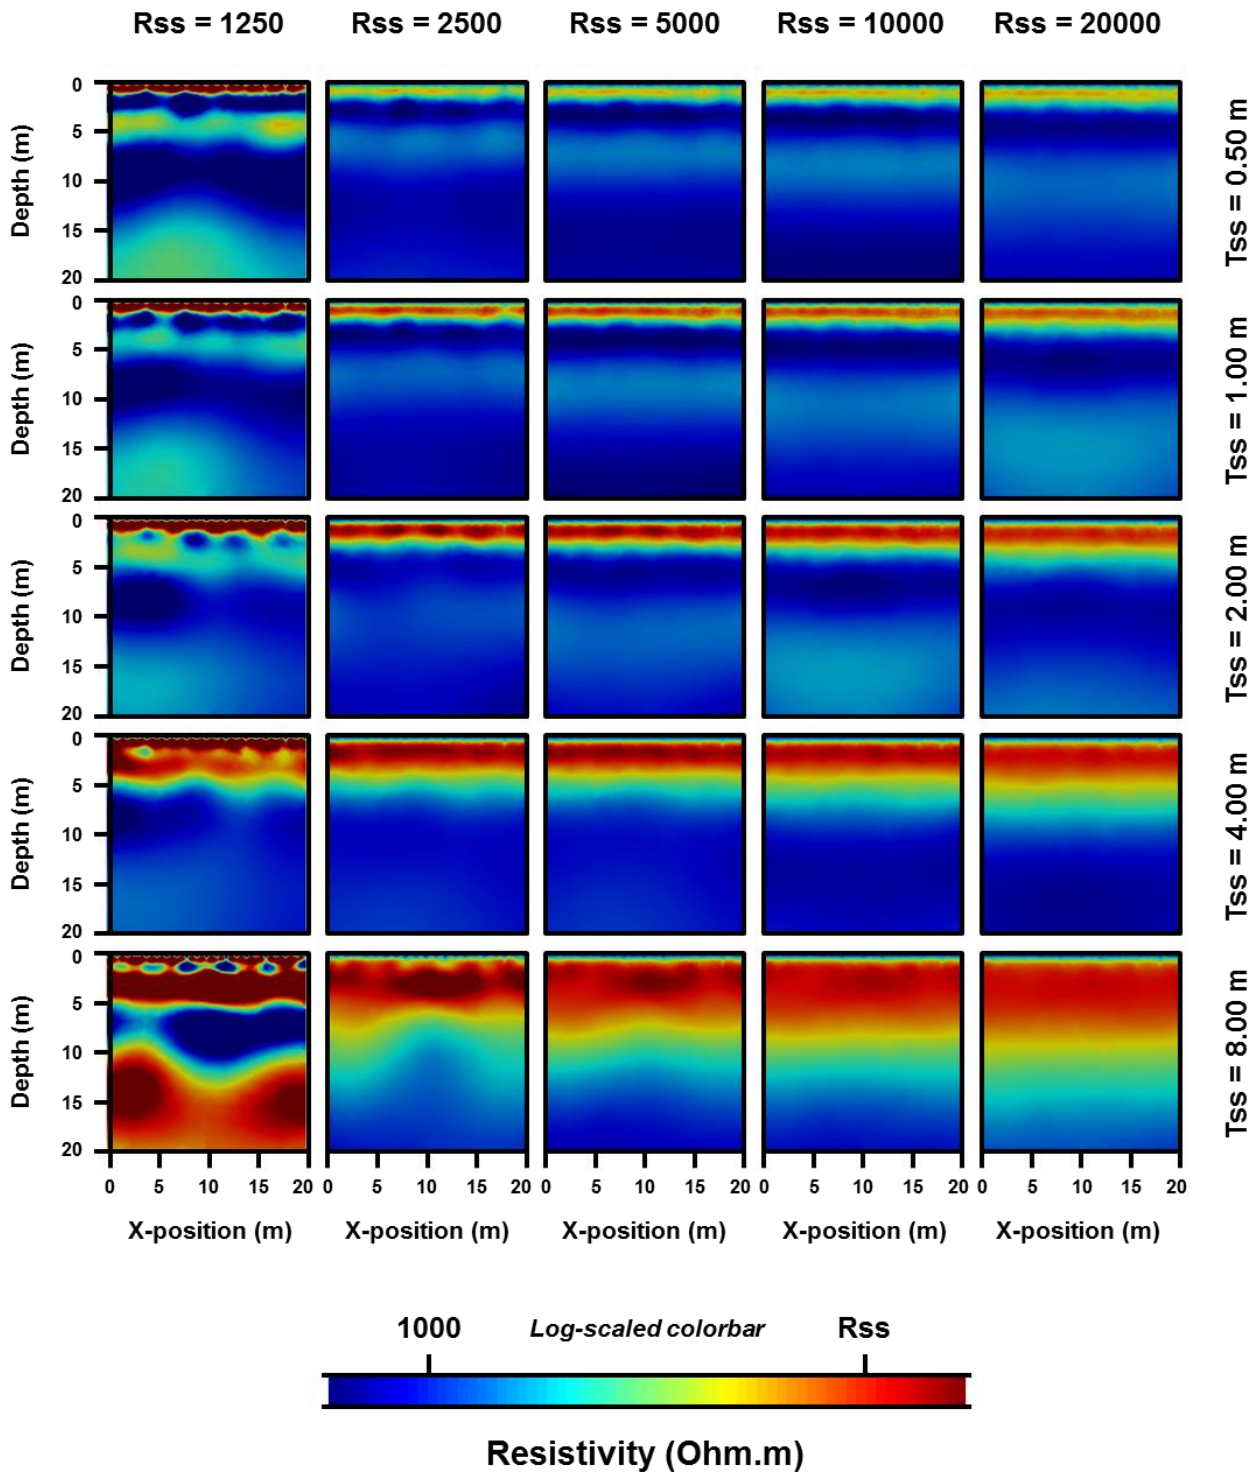

**Figure S12:** Results of inversion of the synthetic resistivity models (Rss and Tss values stand for the subsolum resistivity and thickness in the model, respectively) using the Wenner-Schlumberger array with an ESI of 2 m and upgraded with the four interpolated levels of surficial apparent resistivity.
